### ***Ascaris lumbricoides*, *Ascaris suum*, or “*Ascaris lumbricum*”?**

TO THE EDITOR—For decades, there has been a discussion about the zoonotic potential of the 2 species *Ascaris lumbricoides* and *Ascaris suum* or whether these should be a single species [1–3]. It has been demonstrated that the biological cycle of *Ascaris* organisms originating from humans or from pigs can be completed in both hosts, that cross-transmission occurs, that gene flow and hybridization events occur, that there are genotypes of *Ascaris* that are common to both hosts, and that, when found, there are few differences in their nucleotides. As more *Ascaris* organisms are isolated from different hosts and geographic localities and with different methods, increased evidence will be generated to clarify this question. Progress regarding this matter was recently demonstrated by Betson et al in this journal [4].

We previously demonstrated that, in developing countries where there is a close relationship between these hosts, it is also not uncommon to find *Ascaris* genotypes typical of pigs in humans [5]. This might be interpreted as an indication that cross-transmission also occurs in these regions and that, therefore, there is zoonotic potential among these organisms. We recently conducted a study in the municipality of Guapimirim in the state of Rio de Janeiro and found that, among the subjects with ascariasis, most of the worms genotyped for the target *cox1* had the genotype of *Ascaris* organisms typical in pigs, known as P3 [6].

This result might lead us to think that the infection was acquired from a pig. However, in this population, the majority of the individuals had not had contact with pigs. Therefore, this suggests that the infection was acquired from another human and that it was this other human who had had contact with a pig. Will we reach this so-called mitochondrial Eve someday in the future?

Are we faced with a single species, a more troublesome notion for scientists? Studies have provided new evidence that this is a single species, through comparing the complete mitochondrial genome and, most recently, through analysis of the microRNA of *A. suum* and *A. lumbricoides* [7, 8]. It seems that it is not possible to differentiate them even by using additional molecular targets for genotyping. Perhaps this is simply because these differences do not exist.

In most of the isolates that we have genotyped, independent of the molecular target used, the differences in the nucleotides (when they exist) are small and almost always result in synonymous mutations in the translation to amino acids. This also applies to other *Ascaris* sequences that have been deposited in GenBank by other research groups. This is despite what is seen with so many other parasites that are zoonotic or have genotypes that are considered to be zoonotic, yet are not classified as distinct species, as exemplified by *Giardia duodenalis*.

#### **Notes**

**Financial support.** This work was supported by the Fundação de Amparo à Pesquisa do Estado do Rio de Janeiro, Universidade Federal Fluminense and Laboratório de Doenças Parasitárias, Instituto Oswaldo Cruz-Fiocruz. The authors thank André Barbosa for their technical support and UFF-Platform sequencing.

**Potential conflicts of interest.** All authors: No reported conflicts. All authors have submitted the ICMJE Form for Disclosure of Potential Conflicts of Interest. Conflicts that the editors consider relevant to the content of the manuscript have been disclosed.

Elizabeth Brito da Silva Alves,<sup>1,2</sup>  
 Maria José Conceição,<sup>1,3</sup> and Daniela Leles<sup>4</sup>

<sup>1</sup>Serviço de Doenças Infecciosas e Parasitárias, Curso de Pós-Graduação em Doenças Infecciosas e Parasitárias, Hospital Universitário Clementino Fraga Filho, Universidade Federal do Rio de Janeiro, <sup>2</sup>Laboratório de Parasitologia Ambiental, Departamento de Ciências Biológicas, Escola Nacional de Saúde Pública-Fiocruz, <sup>3</sup>Laboratório de Doenças Parasitárias, Instituto Oswaldo Cruz-Fiocruz, Rio de Janeiro, and <sup>4</sup>Laboratório de Biologia Molecular de Parasitos, Departamento de Microbiologia e Parasitologia, Instituto Biomédico, Universidade Federal Fluminense, Niterói, Brazil

#### **References**

- Anderson TJC. The dangers of using single locus markers in parasite epidemiology: *Ascaris* as a case study. *Trends Parasitol* **2001**; 17:183–8.
- Peng W, Yuan K, Hu M, Gasser RB. Recent insights into the epidemiology and genetics of *Ascaris* in China using molecular tools. *Parasitology* **2007**; 134:325–30.
- Leles D, Gardner SL, Reinhard K, Iñiguez A, Araújo A. Are *Ascaris lumbricoides* and *Ascaris suum* a single species? *Parasit Vectors* **2012**; 5:42.
- Betson M, Nejsun P, Bendall RP, Deb RM, Stothard JR. Molecular epidemiology of ascariasis: a global perspective on the transmission dynamics of *Ascaris* in people and pigs. *J Infect Dis* **2014**; 210:932–41.
- Iñiguez AM, Leles D, Jaeger LH, Carvalho-Costa FA, Araújo A, Amazonas Research Group. Genetic characterisation and molecular epidemiology of *Ascaris* spp. from humans and pigs in Brazil. *Trans R Soc Trop Med Hyg* **2012**; 10:604–12.
- Peng W, Yuan K, Hu M, Zhou X, Gasser RB. Mutation scanning-coupled analysis of haplotypic variability in mitochondrial DNA regions reveals low gene flow between human and porcine *Ascaris* in endemic regions of China. *Electrophoresis* **2005**; 26:4317–26.
- Liu GH, Wu CY, Song HQ, et al. Comparative analyses of the complete mitochondrial genomes of *Ascaris lumbricoides* and *Ascaris suum* from humans and pigs. *Gene* **2012**; 492:110–6.
- Shao CC, Xu MJ, Alasaad S, et al. Comparative analysis of microRNA profiles between adult *Ascaris lumbricoides* and *Ascaris suum*. *BMC Vet Res* **2014**; 10:99.

Received 13 October 2015; accepted 5 January 2016; published online 4 February 2016.

Correspondence: D. Leles, Microbiologia e Parasitologia, Universidade Federal Fluminense, Rua Hernani Melo 101, Niterói, Brazil (dleles@id.ufr.br).

The Journal of Infectious Diseases® 2016;213:1355

© The Author 2016. Published by Oxford University Press for the Infectious Diseases Society of America. All rights reserved. For permissions, e-mail journals.permissions@oup.com. DOI: 10.1093/infdis/jiw027

### ***Ascaris lumbricoides* or *Ascaris suum*: What's in a Name?**

TO THE EDITOR—We thank da Silva Alves et al [1] for their comments. As they rightly point out, the species status of *Ascaris lumbricoides* and *Ascaris suum* has been a matter of debate for some years [2]. We welcome widening the discussion and draw attention to another important milestone in the study of this parasite, the publication of a book about *Ascaris*, edited by Celia Holland [3]. In this volume, we elaborated on this question, concluding that it all depends on the species definition used [4]. For example, based on a phenetic species concept, *A. lumbricoides* and *A. suum* would belong to the same species.

In contrast, based on a biological species concept, it could be argued that they comprise 2 separate species. Confirmation of this would entail experimental crosses, but what experimental infections, hosts, and parental isolates should be used?

As discussed by a number of authors, including da Silva Alves et al and ourselves, the use of mitochondrial markers or DNA barcoding approaches to infer species relationships and transmission dynamics for *Ascaris* is controversial [5]. We have also found pig-associated haplotypes among *Ascaris* worms collected from humans who live in areas where there are no pigs, suggesting retention of ancestral haplotypes. In contrast, based on nuclear markers (microsatellites), these parasites looked like human-associated *Ascaris* [6]. This is an interesting puzzle in Zanzibar, where porcine transmission could have taken place, although hundreds of years ago. We firmly believe that our African-focused sampling has unveiled an important genetic legacy and diversity of ascarids in this region, where it might have first parasitized early hominids. Hopefully, future archaeological studies of parasites will expand and elaborate on this.

This debate on *Ascaris* can, of course, be expanded into the zoonotic transmission of other soil-transmitted helminthiasis, with a new spotlight on *Trichuris trichiura*. Although it is generally accepted that *T. trichiura* (in humans) is a separate species from *Trichuris suis* (in pigs) [7], until recently it was thought that *Trichuris* in humans and nonhuman primates composed a single species (*T. trichiura*). However, ongoing molecular studies of *Trichuris* in samples obtained from humans and nonhuman primates have revealed the evolutionary history of *T. trichiura* to be

more complicated than originally thought. It may comprise a number of species or subspecies, some of which are specific to particular host species and others that are shared between humans and nonhuman primates [8].

To play devil's advocate, does the species status of soil-transmitted helminths really matter? From a public health perspective, it does. With the drive to control and eliminate these parasites from humans, as exemplified by the new initiative of Deworm3 [9], uncovering any zoonotic potential or other natural environmental refugia is important for alternative intervention strategies that may be required. Additionally, any gene flow between worms infecting different hosts could favor the spread of anthelmintic resistance, and, as yet, it is not clear whether the newly described (sub)species of *T. trichiura* shows any significant biological differences in factors such as pathogenesis or response to treatment. This calls for further research.

Our current understanding is lacking. Even though future molecular appraisals will continue to shed new light on parts of the problem, a bottleneck will remain in obtaining sufficient worm material from humans and animals at a level truly representative of natural transmission cycles. We are sure that da Silva Alves et al would agree that better integration of studies in humans and animals and adoption of a One Health approach is a sensible way forward.

#### Notes

**Financial support.** This work was supported by the University of Surrey and the Liverpool School of Tropical Medicine.

**Potential conflict of interest.** Both authors: No reported conflicts. Both authors have submitted the ICMJE Form for Disclosure of Potential Conflicts of Interest. Conflicts that the editors

consider relevant to the content of the manuscript have been disclosed.

Martha Betson<sup>1</sup> and J. Russell Stothard<sup>2</sup>

<sup>1</sup>School of Veterinary Medicine, University of Surrey, Guildford, and <sup>2</sup>Department of Parasitology, Liverpool School of Tropical Medicine, United Kingdom

#### References

1. da Silva Alves EB, Conceição MJ, Leles D. *Ascaris lumbricoides*, *Ascaris suum*, or "*Ascaris lumbricoides*"? J Infect Dis 2016; 213:1355.
2. Leles D, Gardner SL, Reinhard K, Iñiguez A, Araujo A. Are *Ascaris lumbricoides* and *Ascaris suum* a single species? Parasit Vectors 2012; 5:42.
3. *Ascaris*: the neglected parasite. Holland C, ed. London: Academic Press, 2013.
4. Betson M, Nejsum P, Stothard JR. From the twig tips to the deeper branches: new insights into evolutionary history and phylogeography of *Ascaris*. In Holland C, ed. *Ascaris*: the neglected parasite. London: Academic Press, 2013:265–85.
5. Anderson TJC. The dangers of using single locus markers in parasite epidemiology: *Ascaris* as a case study. Trends Parasitol 2001; 17:183–8.
6. Betson M, Halstead FD, Nejsum P, et al. A molecular epidemiological analysis of *Ascaris* on Unguja, Zanzibar using isoenzyme analysis, DNA barcoding and microsatellite DNA profiling. Trans R Soc Trop Med Hyg 2011; 105:370–9.
7. Nejsum P, Betson M, Bendall RP, Thamsborg SM, Stothard JR. Assessing the zoonotic potential of *Ascaris suum* and *Trichuris suis*: looking to the future from an analysis of the past. J Helminthol 2012; 86:148–55.
8. Betson M, Soe MJ, Nejsum P. Human trichuriasis: whipworm genetics, phylogeny, transmission and future research directions. Curr Trop Med Rep 2015; 2:209–17.
9. Natural History Museum. DeWorm3. <http://www.nhm.ac.uk/our-science/our-work/sustainability/deworm3.html>. Accessed 20 January 2016.

Received 21 January 2016; accepted 22 January 2016; published online 4 February 2016.

Correspondence: M. Betson, School of Veterinary Medicine, University of Surrey, Daphne Jackson Road, Guildford GU2 7AL, UK (m.betson@surrey.ac.uk).

The Journal of Infectious Diseases® 2016;213:1355–6

© The Author 2016. Published by Oxford University Press for the Infectious Diseases Society of America. This is an Open Access article distributed under the terms of the Creative Commons Attribution-NonCommercial-NoDerivs licence (<http://creativecommons.org/licenses/by-nc-nd/4.0/>), which permits non-commercial reproduction and distribution of the work, in any medium, provided the original work is not altered or transformed in any way, and that the work is properly cited. For commercial re-use, contact journals.permissions@oup.com. DOI: 10.1093/infdis/jiw037
